# Supplementary material for: Patient Uncertainty Questionnaire-Rheumatology (PUQ-R): development and validation of a new patient-reported outcome instrument for systemic lupus erythematosus (SLE) and rheumatoid arthritis (RA) in a mixed methods study
Source: Springer Nature journal article supplement (doi:10.1186/s12955-016-0432-8), 2016-03-01
Supplement: MOESM1 [file 9764404]

## **Patient Uncertainty Questionnaire - Rheumatology (PUQ-R)**

This questionnaire includes questions about issues related to your arthritis/lupus

*(Depending on population of administration the word arthritis or lupus is used through the questionnaire).*

Please answer each question according to **HOW CERTAIN OR UNCERTAIN** you are about each of these issues.

Please answer all of the questions. If you are not sure, make your best guess.

The following questions relate to your arthritis/lupus symptoms. Thinking about your arthritis/lupus, how certain are you that you understand which symptoms are arthritis/lupus symptoms and which are not? Please **circle** the option that best describes **how certain** you are about the following statements.

|                                                                                                   | Very Uncertain | Somewhat Uncertain | Somewhat Certain | Very Certain |
|---------------------------------------------------------------------------------------------------|----------------|--------------------|------------------|--------------|
| I can tell straight away when I am experiencing an arthritis/lupus symptom.                       | 1              | 2                  | 3                | 4            |
| I can tell apart everyday arthritis/lupus symptoms from flares.                                   | 1              | 2                  | 3                | 4            |
| I can tell which symptoms are specific to arthritis/lupus.                                        | 1              | 2                  | 3                | 4            |
| I can judge how serious my arthritis/lupus symptoms are.                                          | 1              | 2                  | 3                | 4            |
| I can tell apart arthritis/lupus symptoms from the natural symptoms of getting older.             | 1              | 2                  | 3                | 4            |
| I can tell arthritis/lupus symptoms apart from side-effects caused by the medication I am taking. | 1              | 2                  | 3                | 4            |
| I know all the different symptoms related to my arthritis/lupus.                                  | 1              | 2                  | 3                | 4            |
| I know when to expect an arthritis/lupus symptom.                                                 | 1              | 2                  | 3                | 4            |
| I know how long my arthritis/lupus symptoms last.                                                 | 1              | 2                  | 3                | 4            |
| I know what triggers my arthritis/lupus symptoms.                                                 | 1              | 2                  | 3                | 4            |

Think about the state of your arthritis/lupus and how well you are at the moment. Please **circle** the option that best describes **how certain** you are about the following statement.

|                                                    | Very Uncertain | Somewhat Uncertain | Somewhat Certain | Very Certain |
|----------------------------------------------------|----------------|--------------------|------------------|--------------|
| My arthritis/lupus is under control at the moment. | 1              | 2                  | 3                | 4            |

Think about the medications you are taking for your arthritis/lupus at the moment. Please **circle** the option that best describes **how certain** you are about the following statements.

|                                                                      | Very Uncertain | Somewhat Uncertain | Somewhat Certain | Very Certain | Not Applicable |
|----------------------------------------------------------------------|----------------|--------------------|------------------|--------------|----------------|
| I need the medication I am currently taking for my arthritis/lupus.  | 1              | 2                  | 3                | 4            | na             |
| The medications I am taking are helping my arthritis/lupus symptoms. | 1              | 2                  | 3                | 4            | na             |
| The medication I am taking is controlling my arthritis/lupus.        | 1              | 2                  | 3                | 4            | na             |
| I do NOT need a stronger dose of medication for my arthritis/lupus.  | 1              | 2                  | 3                | 4            | na             |
| I do NOT need additional medication for my arthritis/lupus.          | 1              | 2                  | 3                | 4            | na             |
| I do NOT need alternative medication for my arthritis/lupus.         | 1              | 2                  | 3                | 4            | na             |

How well do you think your rheumatology doctor(s) know your arthritis/lupus?  
Please **circle** the option that best describes **how certain** you are about the following statements.

|                                                                                                          | Very Uncertain | Somewhat Uncertain | Somewhat Certain | Very Certain | Not applicable |
|----------------------------------------------------------------------------------------------------------|----------------|--------------------|------------------|--------------|----------------|
| My doctor(s) know which medication(s) and dose(s) are the best for me.                                   | 1              | 2                  | 3                | 4            | na             |
| My doctor(s) know which medication will work best for me.                                                | 1              | 2                  | 3                | 4            | na             |
| My doctor(s) know how to help me control the physical aspects of my arthritis/lupus.                     | 1              | 2                  | 3                | 4            | na             |
| My doctor(s) know exactly what's wrong with me.                                                          | 1              | 2                  | 3                | 4            | na             |
| My doctor(s) know exactly how physically active I should be.                                             | 1              | 2                  | 3                | 4            | na             |
| My doctor(s) know how to help me with the non-physical aspects of my arthritis/lupus (e.g. feeling low). | 1              | 2                  | 3                | 4            | na             |
| My doctor(s) know what caused my arthritis/lupus.                                                        | 1              | 2                  | 3                | 4            | na             |
| My doctor(s) know exactly how my arthritis/lupus will progress in the future.                            | 1              | 2                  | 3                | 4            | na             |

Think about the management of your arthritis/lupus and how well you understand it. Please circle the option that best describes how certain you are about the following statements.

|                                                                                                   | Very Uncertain | Somewhat Uncertain | Somewhat Certain | Very Certain | Not applicable |
|---------------------------------------------------------------------------------------------------|----------------|--------------------|------------------|--------------|----------------|
| I understand my doctor's/nurse's questions, comments and recommendations.                         | 1              | 2                  | 3                | 4            | na             |
| I understand what my medical test results mean.                                                   | 1              | 2                  | 3                | 4            | na             |
| I know which symptoms I need to report to my doctor.                                              | 1              | 2                  | 3                | 4            | na             |
| I know which types of physical activity I should avoid.                                           | 1              | 2                  | 3                | 4            | na             |
| I know exactly how to manage my arthritis/lupus.                                                  | 1              | 2                  | 3                | 4            | na             |
| There are things I can do to help control my arthritis/lupus (e.g. avoid or recover from flares). | 1              | 2                  | 3                | 4            | na             |

Thinking about how people react to your arthritis/lupus, how certain are you about revealing your diagnosis? Please **circle** the option that best describes **how certain** you are about the following statement.

|                                                                                                  | Very Uncertain | Somewhat Uncertain | Somewhat Certain | Very Certain | Not Applicable |
|--------------------------------------------------------------------------------------------------|----------------|--------------------|------------------|--------------|----------------|
| I can confidently reveal my arthritis/lupus diagnosis to others (e.g. social circle & workplace) | 1              | 2                  | 3                | 4            | na             |

Think about the future development of your arthritis/lupus and how easy it is for you to predict it. Please **circle** the option that best describes **how certain** you are about the following statements.

|                                                                          | Very Uncertain | Somewhat Uncertain | Somewhat Certain | Very Certain |
|--------------------------------------------------------------------------|----------------|--------------------|------------------|--------------|
| I know that my arthritis/lupus will flare-up at some time in the future. | 1              | 2                  | 3                | 4            |
| I know what type of flare-ups I will experience.                         | 1              | 2                  | 3                | 4            |
| I can predict when I will experience a flare-up.                         | 1              | 2                  | 3                | 4            |
| I can predict how arthritis/lupus will affect me in the future.          | 1              | 2                  | 3                | 4            |
| I can predict how severe my flare-ups will be.                           | 1              | 2                  | 3                | 4            |
| I can predict how often I will experience a flare-up.                    | 1              | 2                  | 3                | 4            |

Think about how your arthritis/lupus will develop in the future. Please **circle** the option that best describes **how certain** you are about the following statements.

|                                                                      | Very Uncertain | Somewhat Uncertain | Somewhat Certain | Very Certain |
|----------------------------------------------------------------------|----------------|--------------------|------------------|--------------|
| The symptoms of my arthritis/lupus will stay the same in the future. | 1              | 2                  | 3                | 4            |

|                                                                      | Very Uncertain | Somewhat Uncertain | Somewhat Certain | Very Certain |
|----------------------------------------------------------------------|----------------|--------------------|------------------|--------------|
| The severity of my arthritis/lupus will stay the same in the future. | 1              | 2                  | 3                | 4            |

|                                                 | Very Uncertain | Somewhat Uncertain | Somewhat Certain | Very Certain |
|-------------------------------------------------|----------------|--------------------|------------------|--------------|
| I can predict how well I will be in the future. | 1              | 2                  | 3                | 4            |

Think about the effectiveness of your medication in the future. Please **circle** the option that best describes **how certain** you are about the following statement.

| <i>In the future...</i>                                               | Very Uncertain | Somewhat Uncertain | Somewhat Certain | Very Certain | Not Applicable |
|-----------------------------------------------------------------------|----------------|--------------------|------------------|--------------|----------------|
| The medication I am taking will help my arthritis/lupus symptoms.     | 1              | 2                  | 3                | 4            | na             |
| The medication I am taking will control my arthritis/lupus.           | 1              | 2                  | 3                | 4            | na             |
| I will NOT need a stronger dose of medication for my arthritis/lupus. | 1              | 2                  | 3                | 4            | na             |
| I will NOT need additional medication for my arthritis/lupus.         | 1              | 2                  | 3                | 4            | na             |
| I will NOT need alternative medication for my arthritis/lupus.        | 1              | 2                  | 3                | 4            | na             |

Think about what additional treatments for your arthritis/lupus you might need to have in the future. Please **circle** the option that best describes **how certain** you are about the following statement.

|                                                                              | Very Uncertain | Somewhat Uncertain | Somewhat Certain | Very Certain |
|------------------------------------------------------------------------------|----------------|--------------------|------------------|--------------|
| I will NOT need to have surgery related to my arthritis/lupus in the future. | 1              | 2                  | 3                | 4            |

Think about what effect (if any) the medication you are taking for arthritis/lupus could have on your body. Please **circle** the option that best describes **how certain** you are about the following statement.

|                                                                                  | Very Uncertain | Somewhat Uncertain | Somewhat Certain | Very Certain | Not Applicable |
|----------------------------------------------------------------------------------|----------------|--------------------|------------------|--------------|----------------|
| The medication I am taking will NOT cause any severe side effects in the future. | 1              | 2                  | 3                | 4            | na             |

Think about the arthritis/lupus-care team that looks after you (e.g. rheumatology doctors or nurse). Please **circle** the option that best describes **how certain** you would feel about the following statement.

|                                                                                                        | Very Uncertain | Somewhat Uncertain | Somewhat Certain | Very Certain |
|--------------------------------------------------------------------------------------------------------|----------------|--------------------|------------------|--------------|
| It would not be a problem if my arthritis/lupus care team (e.g. different doctor or hospital) changed. | 1              | 2                  | 3                | 4            |

Think about how your arthritis/lupus might develop. How certain are you that you will be able to manage your arthritis/lupus in the future? Please **circle** the option that best describes **how certain** you are about the following statement.

|                                                            | Very Uncertain | Somewhat Uncertain | Somewhat Certain | Very Certain |
|------------------------------------------------------------|----------------|--------------------|------------------|--------------|
| I will be able to manage my arthritis/lupus in the future. | 1              | 2                  | 3                | 4            |



Think of how arthritis/lupus may affect aspects of your personal life. Please **circle** the option that best describes **how certain** you are about the following statements.

|                                                                                                | Very Uncertain | Somewhat Uncertain | Somewhat Certain | Very Certain | Not applicable |
|------------------------------------------------------------------------------------------------|----------------|--------------------|------------------|--------------|----------------|
| Arthritis/lupus will NOT affect my ability to plan my life (e.g. housework)                    | 1              | 2                  | 3                | 4            | na             |
| Arthritis/lupus will NOT affect my ability to complete my education                            | 1              | 2                  | 3                | 4            | na             |
| Arthritis/lupus will NOT affect my relationship with my partner or a future partner.           | 1              | 2                  | 3                | 4            | na             |
| Arthritis/lupus will NOT affect my ability to care for my children.                            | 1              | 2                  | 3                | 4            | na             |
| Arthritis/lupus will NOT affect my functionality (e.g. ability to dress, do the house chores). | 1              | 2                  | 3                | 4            | na             |
| Arthritis/lupus will NOT affect my finances.                                                   | 1              | 2                  | 3                | 4            | na             |
| Arthritis/lupus will NOT affect my ability to exercise.                                        | 1              | 2                  | 3                | 4            | na             |
| Arthritis/lupus will NOT affect my job prospects.                                              | 1              | 2                  | 3                | 4            | na             |
| Arthritis/lupus will NOT affect my mobility (e.g. my ability to walk).                         | 1              | 2                  | 3                | 4            | Na             |
| Arthritis/lupus will NOT affect my pregnancy.                                                  | 1              | 2                  | 3                | 4            | Na             |

Thinking about practical and emotional support, how certain are you that your family and loved ones will support you in the future? Please **circle** the option that best describes **how certain** you are about the following statements.

|                                                                  | Very Uncertain | Somewhat Uncertain | Somewhat Certain | Very Certain |
|------------------------------------------------------------------|----------------|--------------------|------------------|--------------|
| My family and loved ones will help me manage my arthritis/lupus. | 1              | 2                  | 3                | 4            |
